# Supplementary material for: The Combination of Molecular Adjuvant CCL35.2 and DNA Vaccine Significantly Enhances the Immune Protection of Carassius auratus gibelio against CyHV-2 Infection
Source: PubMed Central journal article supplement (PMC7712643; doi:10.3390/vaccines8040567), 2020-10-01
Supplement: vaccines-08-00567-s001.pdf [file vaccines-08-00567-s001.pdf]

# Appendix

Table S1 Primer sequences in this study.

| Gene name       | Primer name          | Primer sequence (5'-3')                                         | Amplicon size (nt) |
|-----------------|----------------------|-----------------------------------------------------------------|--------------------|
| ORF25           | A036F                | TCGAGGATCCGCCACCATGGGGTTCCAACGGTGTCTG                           | 1818               |
|                 | A036R                | TCGAGAATTCTCAAGCGTAATCTGGAACATCGTATGGGTAAGA<br>GGGCAACTTCACGTAC |                    |
| CCL35.2         | A037F                | TCGAGGATCCGCCACCATGTCTGCTTCTCGCTTCGTC                           | 324                |
|                 | A037R                | TCGAGAATTCTTAAGCGTAATCTGGAACATCGTATGGGTACAA<br>GGTCCCTTGGCTTCCG |                    |
| IL-1 $\beta$    | A052F                | ACTGGAGATGTCTTCGCATCC                                           | 119                |
|                 | A052R                | GCAGCGCATCTTCACAAATCT                                           |                    |
| IL-2            | A053F                | GACCACAAAGGTAGACCCATCC                                          | 212                |
|                 | A053R                | GAGGTTTGTGCGGAATGGAC                                            |                    |
| IFN- $\gamma$ 2 | A054F                | GACTGCGCAACACATGATGG                                            | 112                |
|                 | A054R                | CTCGTCGATGCTCTTGTTCCA                                           |                    |
| Viperin         | A055F                | AAGTCATAGGTCGAGGTCAGGG                                          | 207                |
|                 | A055R                | CGTTTTCACCTTCAATTAGCAGA                                         |                    |
| IgM             | A056F                | GTCAATCTTCGGCTTGTCTCA                                           | 179                |
|                 | A056R                | GGGTATAATCTCCATCGGGTC                                           |                    |
| TK              | A057F                | ACAGCGGAGCAAAATACCCA                                            | 236                |
|                 | A057R                | TTTGTTGGCGACGGGGATAA                                            |                    |
|                 | A040F*               | ATGGCTTTTCTGGAGTTGGT                                            | 324                |
| A040R*          | GCACCCACGATAACATACTT |                                                                 |                    |
| $\beta$ -actin  | A058F                | ACCCCATGAGCACGGTATT                                             | 235                |
|                 | A058R                | CGACCAGAAGCGTACAGAGA                                            |                    |

\* The primers were used in virus detection in serum-incubation-infection experiments.

Table S2 Statistical results of histological lesions in gill, spleen and trunk kidney of gibel carp on day 7 post CyHV-2 infection.

-, none; +, mild; ++, moderate; +++, severe. n = 3.

| Lesion          | Gill |      | Spleen        |              | Trunk kidney         |               |
|-----------------|------|------|---------------|--------------|----------------------|---------------|
|                 | SEC  | SBLC | Vacuolization | Karyorrhexis | Hypertrophied nuclei | Vacuolization |
| Control         | -    | -    | -             | -            | -                    | -             |
| CCL35.2/ORF25   | -    | +    | +             | -            | +                    | -             |
| ORF25           | -    | +    | +             | +            | +                    | +             |
| CCL35.2/Vaccine | -    | ++   | ++            | +            | -                    | +             |
| Vaccine         | +    | ++   | ++            | ++           | ++                   | +++           |
| CCL35.2         | +++  | +++  | ++            | ++           | +++                  | +++           |
| pcDNA3.1-neo    | +++  | +++  | ++            | +++          | +++                  | +++           |
| PBS             | +++  | +++  | +++           | +++          | +++                  | +++           |

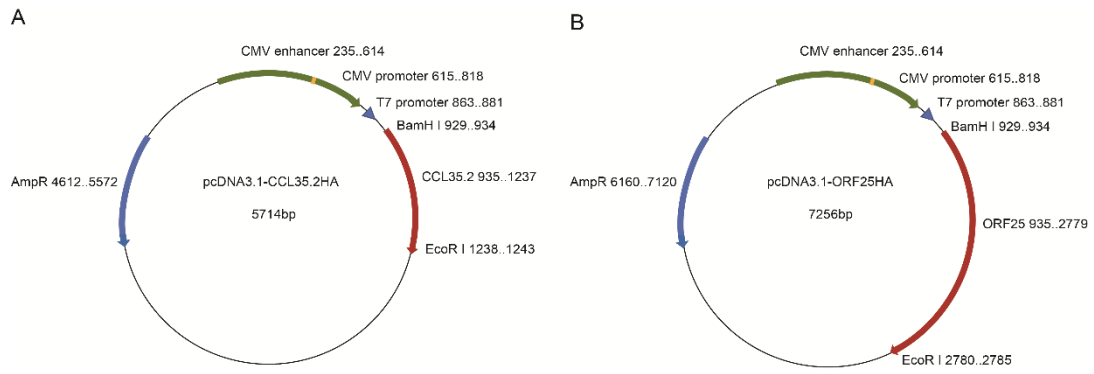

Figure S1 The plasmid maps of pcDNA3.1-CCL35.2HA and pcDNA3.1-ORF25HA. BamH I with kozak sequence (GCCACC) and EcoR I restriction digestion sites were added to the forward and reverse primers respectively.
